# Supplementary material for: Wound healing potential of mouth gel containing isopimarane diterpene from Kaempferia galanga rhizomes for treatment of oral stomatitis
Source: PeerJ. 2024 Dec 18;12:e18716. doi: 10.7717/peerj.18716 (PMC11662896; doi:10.7717/peerj.18716)
Supplement: Supplemental Information 1 [file peerj-12-18716-s001.xlsx]

## Sheet: Table 2
	Table 2. Physical stability of gel base and KG6 mouth gel before and after heating-cooling test.
	pH values								Viscosity
	Before heating-cooling test	Repeat 1	Repeat 2	Repeat 3	Average	SD	SEM		Before heating-cooling test	Repeat 1 (×104 cP)	Repeat 2 (×104 cP)	Repeat 3 (×104 cP)	Average (×104 cP)	SD	SEM
	Gel base	5.85	5.87	5.87	5.86	0.011547	0.01		Gel base	5	5	5	5	0	0
	0.10% KG6 mouth gel	5.87	5.88	5.89	5.88	0.01	0.01		0.10% KG6 mouth gel	6.5	6.5	6	6.33	0.288675	0.3
	0.25% KG6 mouth gel	5.84	5.85	5.86	5.85	0.01	0.01		0.25% KG6 mouth gel	4	5.5	6	5.16	1.04083	0.6
	0.50% KG6 mouth gel	5.88	5.9	5.89	5.89	0.01	0.01		0.50% KG6 mouth gel	5	4.5	5.5	5.03	0.5	0.288
	pH values								Viscosity
	After heating-cooling test	Repeat 1	Repeat 2	Repeat 3	Average	SD	SEM		After heating-cooling test	Repeat 1 (×104 cP)	Repeat 2 (×104 cP)	Repeat 3 (×104 cP)	Average (×104 cP)	SD	SEM
	Gel base	5.87	5.87	5.87	5.87	0	0		Gel base	6	6.5	7	6.5	0.5	0.29
	0.10% KG6 mouth gel	5.88	5.86	5.89	5.87	0.0152753	0.01		0.10% KG6 mouth gel	6	7.5	6.5	6.67	0.763763	0.44
	0.25% KG6 mouth gel	5.88	5.88	5.89	5.88	0.0057735	0.01		0.25% KG6 mouth gel	6.5	5.5	6	6	0.5	0.28
	0.50% KG6 mouth gel	5.84	5.81	5.81	5.82	0.0173205	0.01		0.50% KG6 mouth gel	6	6	5.5	5.83	0.288675	0.16

## Sheet: Table 3
	Table 3. KG6 contents obtained from GC analysis of mouth gel containing 0.10, 0.25, and 0.50% w/w of KG6 (6b-acetoxysandaracopimaradiene-1a,9a-diol) before and after heating-cooling test.
	KG6 content
	Before heating-cooling test	Repeat 1 (mg/30g)	Repeat 2 (mg/30g)	Repeat 3 (mg/30g)	Average (mg/30g)	SD	SEM
	0.10% KG6 mouth gel	34	36.5	38.22	36.24	2.12198	1.23
	0.25% KG6 mouth gel	75	81.08	77.5	77.86	3.05595	1.764
	0.50% KG6 mouth gel	159.5	158	162.29	159.93	2.17709	1.2569
	KG6 content
	After heating-cooling test	Repeat 1 (mg/30g)	Repeat 2 (mg/30g)	Repeat 3 (mg/30g)	Average (mg/30g)	SD	SEM
	0.10% KG6 mouth gel	35.5	34	37.36	35.62	1.68321	0.971802
	0.25% KG6 mouth gel	82.5	89.8	86	86.1	3.65103	2.10792
	0.50% KG6 mouth gel	167.6	167.55	167.68	167.61	0.0655744	0.0378594

## Sheet: Table 4
	Table 4. Anti-NO production in RAW264.7 cells of KG6 from K. galanga.
	Anti-NO production (% inhibition)
	Sample	Conc. (µM)	Repeat 1 (%)	Repeat 2 (%)	Repeat 3 (%)	Average (%)	SD	SEM
	KG6 compound	1	9.1	16.9	3.9	10	6.5	3.8
		3	12.7	15.3	5.8	11.3	4.9	2.8
		10	22.8	22.2	12.5	19.2	5.8	3.3
		30	42.1	42.7	38	40.9	2.6	1.5
		100	79.3	77.8	76.6	77.9	1.4	0.8
	Anti-NO production (% inhibition)
	Positive control	Conc. (µM)	Repeat 1 (%)	Repeat 2 (%)	Repeat 3 (%)	Average (%)	SD	SEM
	Indomethacin	1	14.9	6.5	22.4	14.6	7.95424	4.6
		3	22	14.4	9.1	15.2	6.5	3.7
		10	29.1	19.2	12	20.1	8.6	5
		30	38.8	44	47	43.3	4.1	2.4
		100	60.1	61.2	90.6	70.6	17.3	10
	half-maximal inhibitory concentration (IC50) (µM)
	sample and positive control	Repeat 1 (µM)	Repeat 2 (µM)	Repeat 3 (µM)	Average (µM)	SD	SEM
	KG6 compound	33.609	34.3539	40.8461	36.2697	3.98078	2.2983
	Indomethacin	38.65	45.18	31.19	38.2	7	4

## Sheet: Table 5
	Table 5. Anti-NO production of gel base and mouth gel containing KG6 before and after accelerating conditions.
		Anti-NO production (% inhibition)
		Sample	Conc (µg/ml)	Repeat 1 (%)	Repeat 2 (%)	Repeat 3 (%)	Average (%)	SD	SEM
	Before heating-cooling test	Gel base	10	2.7	7.4	9.74265	6.6	3.58648	2.07065
			30	7.90441	10.4	10.3	9.5	1.41285	0.815707
			100	2	7.5	13	7.5	5.5	3.17543
			300	9.55882	18.5	15.3	14.5	4.53037	2.61561
			1000	67.6471	47.1	49.2	54.6	11.3055	6.52723
		0.1% KG6 mouth gel	10	18	3	0.6	7.2	9.42974	5.44426
			30	17.1	6.9	0.2	8.1	8.51019	4.91336
			100	17.5857	6.2	4.7	9.5	7.04657	4.06834
			300	22.6528	15.5	5	14.4	8.87911	5.12636
			1000	76.8	69.1	45.1	63.7	16.5337	9.54574
		0.25% KG6 mouth gel	10	6.7	6.5	5.6	6.3	0.585947	0.338296
			30	9.4	9.6	2.8	7.3	3.86954	2.23408
			100	9.68703	10.5	1.9	7.4	4.74796	2.74124
			300	10.4322	10.6	7.5	9.5	1.74336	1.00653
			1000	80.2	69.4	58	69.2	11.1014	6.40937
		0.5% KG6 mouth gel	10	6.5	2.6	0.5	3.2	3.04467	1.75784
			30	15.1	4.7	3	7.6	6.55057	3.78197
			100	13.1	3.3	2.2	6.2	6.00083	3.46458
			300	21.7586	16.7	4.2	14.2	9.03827	5.21825
			1000	83.0104	74.1	70.5	75.9	6.44032	3.71832
	After heating-cooling test	Gel base	10	3.6	0.2	0.7	1.5	1.83576	1.05987
			30	36.9	12.4	10	19.8	14.8863	8.59464
			100	36.4	30.8	10.5	25.9	13.6275	7.86787
			300	39.9	36.3	8.7	28.3	17.0693	9.85495
			1000	54.2	49.8	58.7	54.2	4.45009	2.56926
		0.1% KG6 mouth gel	10	18.5	6.3	36.2	20.3	15.0341	8.67993
			30	21.2	14.4	39.1	24.9	12.7589	7.36637
			100	24.2	9.6	35.1	23	12.7947	7.387
			300	26.5	6.7	42.1	25.1	17.7415	10.243
			1000	62.1	57.6	73.4	64.4	8.14023	4.69976
		0.25% KG6 mouth gel	10	7.8	19.2	1.7	9.6	8.88275	5.12846
			30	10.2	36.4	7	17.9	16.1299	9.3126
			100	16.8	42.3	7.5	22.2	18.0175	10.4024
			300	21.6	47.6	7.3	25.5	20.4311	11.7959
			1000	75.8	50.8	68.6	65.1	12.8691	7.42997
		0.5% KG6 mouth gel	10	1.2	29.1	4.9	11.7	15.1533	8.74878
			30	7.6	31	16.1	17.9	11.845	6.8387
			100	7.4	36.4	18.2	20.7	14.6565	8.46194
			300	5.6	33.7	21.2	20.2	14.0785	8.12821
			1000	62.5	77	68.8	69.4	7.27072	4.19775
	Positive control	TA oral paste	10	29.9	18.4	10.4	19.6	9.80221	5.65931
			30	36.9	24.7	11.2	24.3	12.8555	7.42211
			100	38.4	21.3	13.5	24.4	12.7362	7.35323
			300	61.4	52.8	30.9	48.4	15.7259	9.07934
			1000	93.1	90.6	89.7	91.1	1.76163	1.01708
		Khaolaor mouth gel	10	-8.6	-0.1	-0.9	-3.2	4.69361	2.70986
			30	-7.4	-4.4	-3.5	-5.1	2.04206	1.17898
			100	-1.5	-1.9	0.1	-1.1	1.0583	0.61101
			300	10.8	14.3	16.3	13.8	2.78388	1.60728
			1000	75.3	90.3	86.5	84	7.79829	4.50235
		half-maximal inhibitory concentration (IC50) (µM)	Repeat 1 (µM)	Repeat 2 (µM)	Repeat 3 (µM)	Average (µM)	SD	SEM
	Before heating-cooling test	Gel base	690.2	1109	1247.4	1015.5	290.1	167.5
		0.1% KG6 mouth gel	498.6	800.7	933.2	744.2	222.7	128.6
		0.25% KG6 mouth gel	544.8	789.6	705.2	679.9	124.4	71.8
		0.5% KG6 mouth gel	460.4	601.7	610.9	557.7	84.4	48.7
	After heating-cooling test	Gel base	702.6	1438.8	700.3	947.2	425.7	245.8
		0.1% KG6 mouth gel	500.1	596.8	755.1	617.3	128.7	74.3
		0.25% KG6 mouth gel	603.4	660.3	535.1	599.6	62.7	36.2
		0.5% KG6 mouth gel	614.589	408.201	396.586	575.6	94.6	54.6
	Positive control	TA oral paste	178.3	164.7	334.6	225.9	94.4	54.5
		Khaolaor mouth gel	518.2	577.2	405.6	500.3	87.2	50.3

## Sheet: Table 6
	Table 6. Effect of KG6 and allantoin on HGF-1 cell proliferation.
	HGF-1 cells proliferation (%)
	Sample	Conc. (µM)	Repeat 1 (%)	Repeat 2 (%)	Repeat 3 (%)	Average (%)	SD	SEM
	KG6 compound	1	98.75	97.11	94.4	96.8	2.2	1.3
		3	97.39	102.78	96.28	98.8	3.48	2
		10	105.57	109.77	103.13	106.2	3.36	1.9
		30	112.92	118.51	113.2	114.9	3.15	1.8
		100	102.1	109.07	101.01	104.1	4.37	2.5
	HGF-1 cells proliferation
	Positive control	Conc. (µM)	Repeat 1 (%)	Repeat 2 (%)	Repeat 3 (%)	Average (%)	SD	SEM
	Allantoin	1	86.62	99.4	103.65	96.6	8.86	5.1
		3	93.4	102.03	103.63	99.7	5.5	3.2
		10	97.35	103.39	103.9	101.6	3.64	2.1
		30	93.61	102.57	101.94	99.4	5	2.9
		100	86.29	94.4	96.21	92.3	5.29	3.1

## Sheet: Table 7
	Table 7. Effect of gel base and mouth gel containing KG6 before and after the accelerating conditions on HGF-1 cells proliferation.
		HGF-1 cells proliferation (%)
		Sample	Conc (µg/ml)	Repeat 1 (%)	Repeat 2 (%)	Repeat 3 (%)	Average (%)	SD	SEM
	Before heating-cooling test	Gel base	1	98.6067	97.3157	95.4125	97.1	1.6	0.9
			3	99.2755	99.0944	98.1303	98.8	0.6	0.4
			10	99.647	98.8195	97.7255	98.7	1	0.6
			30	99.9443	97.6067	99.0555	98.9	1.2	0.7
			100	99.7709	98.5123	99.8458	99.4	0.7	0.4
		0.1% KG6 mouth gel	1	89.4668	100.469	85.8712	91.9	7.60557	4.4
			3	95.5601	101.245	84.6569	93.8	8.4298	4.9
			10	98.1609	98.6255	90.7864	95.9	4.3979	2.5
			30	98.2352	98.3829	92.8103	96.5	3.17555	1.8
			100	98.681	97.9463	93.2729	96.6	2.93336	1.7
		0.25% KG6 mouth gel	1	101.282	98.3829	97.7833	99.1	1.87093	1.1
			3	101.876	100.032	97.4942	99.8	2.20018	1.3
			10	102.917	101.779	99.0555	101.3	1.98405	1.1
			30	103.214	97.0246	101.079	100.4	3.14389	1.8
			100	104.031	99.7898	101.369	101.7	2.14367	1.2
		0.5% KG6 mouth gel	1	89.021	106.048	87.2591	94.1	10.3766	6
			3	95.1142	103.477	85.3508	94.6	9.07197	5.2
			10	97.4178	101.73	90.4395	96.5	5.69761	3.3
			30	98.3095	101.148	97.2629	98.9	2.01031	1.2
			100	99.3498	101.682	97.899	99.6	1.90841	1.1
	After heating-cooling test	Gel base	1	95.8294	97.0734	95.1422	96	0.978904	0.6
			3	98.4597	96.8254	96.6232	97.3	1.00702	0.6
			10	99.0521	98.1647	98.6374	98.6	0.444042	0.3
			30	99.2417	97.2222	99.9408	98.8	1.4117	0.8
			100	99.7156	97.9497	98.4202	98.7	0.914502	0.5
		0.1% KG6 mouth gel	1	97.109	97.1726	97.3934	97.2	0.14924	0.1
			3	97.109	97.2222	95.9716	96.8	0.691705	0.4
			10	97.7488	94.246	96.1493	96	1.75359	1
			30	97.891	95.0397	94.7867	95.9	1.72387	1
			100	97.4645	95.8829	94.6682	96	1.40211	0.8
		0.25% KG6 mouth gel	1	100.379	96.9742	99.0521	98.8	1.71622	1
			3	98.4597	99.1071	99.6445	99.1	0.593268	0.3
			10	100.806	98.7599	101.659	100.4	1.48976	0.9
			30	103.081	98.0655	105.095	102.1	3.61984	2.1
			100	103.72	101.091	105.806	103.5	2.36243	1.4
		0.5% KG6 mouth gel	1	96.7536	101.587	99.8815	99.4	2.45149	1.4
			3	98.7441	98.7599	97.9265	98.5	0.476644	0.3
			10	101.232	97.619	99.8223	99.6	1.82105	1.1
			30	99.6682	96.5278	98.1043	98.1	1.57024	0.9
			100	99.7393	97.0238	94.9645	97.2	2.39494	1.4
	Positive control	TA oral paste	1	100.347	102.157	102.349	101.6	0.916662	0.5
			3	98.2656	113.578	98.4127	103.4	8.79871	5.1
			10	95.9366	102.206	94.4339	97.5	4.12243	2.4
			30	95.4906	96.6176	98.2011	96.8	1.36162	0.8
			100	95.6392	103.775	96.4233	98.6	4.48772	2.6
		Khaolaor mouth gel	1	96.1843	110.931	105.693	104.3	7.15486	3.6
			3	93.9049	106.324	99.5132	99.9	6.21902	3.6
			10	83.9941	85.5392	97.3545	89	7.30856	4.2
			30	81.5164	110.637	100.614	97.6	14.7942	8.5
			100	83.4985	86.1275	100.952	90.2	9.41034	5.4

## Sheet: Table 8
	Table 8. HGF-1 cells migration of compound KG6 and allantoin.
	Length between the scratch (µm)
	Sample	Day	Conc. (µM)	Repeat 1 (µm)	Repeat 2 (µm)	Repeat 3 (µm)	Average (µm)	SD	SEM
	Control	Day 0	0	1019.29	998.753	958.407	992.2	31	17.9
		Day 1	0	733.97	730.303	767.84	744	20.7	11.9
		Day 2	0	342.087	274.703	290.077	302.3	35.3	20.4
		Day 3	0	210.13	211.73	239.373	220.4	16.4	9.5
	KG6 compound	Day 0	10	1037.02	1022.84	942.14	1000.7	51.2	29.5
			30	989.643	995.217	954.867	979.9	21.9	12.6
			100	994.52	995.983	986.057	992.2	5.4	3.1
		Day 1	10	654.033	633.983	632.577	640.2	12	6.9
			30	656.71	698.423	698.423	684.5	24.1	13.9
			100	627.617	627.617	618.983	624.7	5	2.9
		Day 2	10	339.183	353.073	373.337	355.2	17.2	9.9
			30	259.913	288.983	283.3	277.4	154	8.9
			100	337.833	320.357	346.373	334.9	13.3	7.7
		Day 3	10	136.517	98.35	81.68	105.5	28.1	16.2
			30	134.57	81.79	111.097	109.2	26.4	15.3
			100	56.9033	81.6667	106.23	81.6	24.7	14.2
	Allantoin	Day 0	10	969.117	963.433	956.393	963	6.4	3.7
		Day 1	10	597.033	584.027	573.133	584.7	12	6.9
		Day 2	10	223.763	240.6	354.04	272.8	70.9	40.9
		Day 3	10	49.3567	80.7	112.337	80.8	31.5	18.2
	% Cell migration
	Sample	Day	Conc. (µM)	Repeat 1 (%)	Repeat 2 (%)	Repeat 3 (%)	100% - Average (%)	SD	SEM
	Control	Day 1	0	72.0077	73.1215	80.1163	24.9	4.4	2.5
		Day 2	0	33.5612	27.5046	30.2666	69.6	3	1.8
		Day 3	0	20.6153	21.1994	24.9762	77.7	2.4	1.4
	KG6 compound	Day 1	10	63.0685	61.9826	67.1425	35.9	2.72033	1.6
			30	66.3583	70.178	73.1435	30.1	3.4016	2
			100	63.1075	63.0148	62.7736	37	0.172357	0.1
		Day 2	10	32.7075	34.5189	39.6265	64.4	3.6	2.1
			30	26.2633	29.0372	29.6691	71.7	1.8	1
			100	33.9695	32.1649	35.1271	66.2	1.5	0.9
		Day 3	10	13.1643	9.61538	8.66962	89.5	2.4	1.4
			30	13.5978	8.21831	11.6348	88.8	2.7	1.6
			100	5.72169	8.1996	10.7732	91.8	2.5	1.5
	Allantoin	Day 1	10	61.6059	60.6193	59.9265	39.3	0.8	0.5
		Day 2	10	23.0894	24.9732	37.0182	71.6	7.6	4.4
		Day 3	10	5.09295	0	11.7459	94.4	5.9	3.4

## Sheet: Table 9
	Table 9. HGF-1 cell migration of gel base and mouth gel containing KG6 before and after the accelerating conditions.
		Length between the scratch (µm)
		Sample	Day	Conc (µg/ml)	Repeat 1 (µm)	Repeat 2 (µm)	Repeat 3 (µm)	Average (µm)	SD	SEM
	Control	Control	Day 0	-	1004.7	1034.7	1064.7	1034.7	30	35.5
			Day 1	-	629	709	789	709	80	38
			Day 2	-	329	478	403.5	403.5	74.5	59.7
			Day 3	-	300	309.4	318.8	309.4	9.4	17.8
	Before heating-cooling test	Gel base	Day 0	10	1060.2	1089.2	1118.2	1089.2	29	16.7432
				100	1027.5	1063.2	1098.8	1063.2	35.65	20.5825
			Day 1	10	555	668.8	785.6	668.8	115.303	66.5704
				100	680	910.6	795.3	795.3	115.3	66.5685
			Day 2	10	406	420.4	413.2	413.2	7.2	4.15692
				100	400	443.1	486.2	443.1	40.4145	24.8
			Day 3	10	300	363.9	427.8	363.9	33.4012	36.8
				100	310	345.8	381.5	345.8	115.902	20.6403
		0.10% KG6 mouth gel	Day 0	10	1171.02	1200.01	1146.7	1172.6	26.6907	15.4
				100	1101.67	1143.33	1138.34	1127.8	22.7	13.1
			Day 1	10	385.423	472.93	415.423	424.6	44.5	25.7
				100	401.777	425.417	470.487	432.6	34.9	20.2
			Day 2	10	246.68	264.587	201.253	237.5	32.6	18.8
				100	332.087	292.09	344.587	322.9	27.4	15.8
			Day 3	10	40.42	40.8433	48.3367	43.2	4.5	2.6
				100	12.9167	29.1667	48.7533	30.3	17.9	10.4
		0.25% KG6 mouth gel	Day 0	10	1041.67	973.35	1110.17	1041.7	68.4	39.5
				100	1199.17	1211.67	1033.33	1148.1	99.6	57.5
			Day 1	10	322.11	364.583	340	342.2	21.3	12.3
				100	395.833	442.503	479.583	439.3	24.2	24.2
			Day 2	10	130.43	165.837	165.833	154	20.4	11.5
				100	245.427	163.757	168.773	192.7	45.8	26.4
			Day 3	10	52.9167	45.9	45.8367	48.2	4.1	2.3
				100	11.2567	56.67	45.8367	37.9	23.7	13.7
		0.50% KG6 mouth gel	Day 0	10	1134.2	1133.37	1103.43	1123.7	17.5	10.1
				100	1051.68	1150.01	1134.18	1112	30.5	30.5
			Day 1	10	406.667	386.677	389.187	394.2	10.9	6.3
				100	358.773	352.51	387.09	366.1	18.4	10.6
			Day 2	10	198.333	219.62	202.59	206.8	11.3	6.5
				100	187.937	202.54	203.35	197.9	8.7	5
			Day 3	10	66.72	61.6733	51.6833	60	7.7	4.4
				100	46.25	33.76	32.0833	37.4	7.7	4.5
	After heating-cooling test	Gel base	Day 0	10	1070	1090	1105.5	1088.5	7.63763	10.2754
				100	900	933.5	967	933.5	17.5594	19.3412
			Day 1	10	750	774.6	799.1	774.6	14.0233	14.174
				100	640	676	712	676	25	20.7846
			Day 2	10	530	546.2	562.5	546.2	7.63763	9.38196
				100	400	453.4	506.8	453.4	13.4705	30.8305
			Day 3	10	290	331.5	373	331.5	35.0583	23.96
				100	160	188.8	217.5	188.8	13.5011	16.5988
		0.10% KG6 mouth gel	Day 0	10	1274.17	1236.68	1207.51	1239.5	33.4	19.3
				100	1155.85	1185.83	1094.17	1145.3	46.7	27
			Day 1	10	362.933	351.67	347.083	353.9	8.2	4.7
				100	445.417	417.917	403.75	422.4	21.2	12.2
			Day 2	10	164.177	155	169.587	162.9	7.4	4.3
				100	259.583	275.007	262.917	265.8	8.1	4.7
			Day 3	10	9.59333	15.4233	15.8333	13.6	3.5	2
				100	38.3333	17.5033	30.0267	28.6	10.5	6.1
		0.25% KG6 mouth gel	Day 0	10	1067.51	1067.5	1145.01	1093.3	44.8	25.8
				100	1162.51	1192.53	1225.01	1193.3	31.3	18
			Day 1	10	417.5	377.92	367.917	387.8	26.2	15.1
				100	393.333	387.083	379.6	3867	6.9	4
			Day 2	10	195.417	185	155.417	178.6	20.8	12
				100	173.333	128.753	154.173	152.1	22.4	12.9
			Day 3	10	56.6833	37.0867	54.5867	49.5	10.8	6.2
				100	12.5	50	14.5833	25.7	21.1	12.2
		0.50% KG6 mouth gel	Day 0	10	1083.34	1211.67	1207.5	1167.5	72.9	42.1
				100	1090.01	1204.17	1074.18	1122.8	70.9	40.9
			Day 1	10	356.667	442.51	471.673	423.6	59.8	34.5
				100	308.333	307.92	332.92	316.4	14.3	8.3
			Day 2	10	137.52	167.083	130.42	145	19.4	11.2
				100	170.9	147.927	135.003	151.3	18.2	10.5
			Day 3	10	50.8767	50.4233	36.6667	46	8.1	4.7
				100	38.3367	42.1033	41.2567	40.6	2	1.1
	Posotive control	TA oral paste	Day 0	10	1050.91	1010.05	1084	1048.3	37	21.4
			Day 1	10	889.385	766.78	875.753	844	67.2	38.8
			Day 2	10	632.485	671.423	568.278	624.1	52.1	30.1
			Day 3	10	469.017	681.153	579.95	576.7	106.1	61.3
		Khaolaor mouth gel	Day 0	10	963.34	1010.05	982.8	985.4	23.5	13.5
			Day 1	10	628.6	535.185	747.32	637	106.3	61.4
			Day 2	10	445.672	332.797	576.048	451.5	121.7	70.3
			Day 3	10	239.382	251.055	293.86	261.4	28.7	16.6
		Cell migration (%)
		Sample	Day	Conc (µg/ml)	Repeat 1 (%)	Repeat 2 (%)	Repeat 3 (%)	100% - Average (%)	SD	SEM
	Control	Control	Day 1	-	67	68.5	70	31.5	1.5	0.866025
			Day 2	-	29	49	39	61	10	5.7735
			Day 3	-	27.5	27.2	35.5	69.9	4.08085	2.71805
	Before heating-cooling test	Gel base	Day 1	10	60.1	58	65.8	38.7	4.03609	2.33024
				100	70.4	74.8	79.3	25.2	4.20159	2.56926
			Day 2	10	37.5	36	40.1	62.1	1.70392	1.19768
				100	41.7	45.4	37.9	58.3	4.20991	2.16513
			Day 3	10	28	33.5	38.4	66.7	5.20288	3.00389
				100	18	33	47.4	67.2	14.701	8.48764
		0.10% KG6 mouth gel	Day 1	10	32.9134	39.4104	36.2277	63.8	3.2	1.9
				100	36.4698	37.2085	41.3311	61.7	2.6	1.5
			Day 2	10	21.0653	22.0486	17.5507	79.8	2.4	1.4
				100	30.1439	25.5472	30.2711	71.3	2.7	1.6
			Day 3	10	3.45168	3.40357	4.21528	96.3	0.5	0.3
				100	1.17246	2.55102	4.28286	97.3	1.6	0.9
		0.25% KG6 mouth gel	Day 1	10	30.9226	37.4566	30.6258	67	3.9	2.2
				100	33.0089	36.5201	46.4113	61.4	6.9	4
			Day 2	10	12.5213	17.0377	14.9376	85.2	2.3	1.3
				100	20.4664	13.515	16.3329	83.2	3.5	2
			Day 3	10	5.08	4.71567	4.12878	95.4	0.5	0.3
				100	0.938705	4.67702	4.43581	96.6	2.1	1.2
		0.50% KG6 mouth gel	Day 1	10	35.8549	34.1175	35.2707	64.9	0.9	0.5
				100	34.1143	30.6527	34.1295	67	2	1.2
			Day 2	10	17.4866	19.3777	18.3601	81.6	0.9	0.5
				100	17.8701	17.612	17.9293	82.2	0.2	0.1
			Day 3	10	5.88256	5.4416	4.68389	94.7	0.6	0.4
				100	4.39773	2.93562	2.82877	96.6	0.9	0.5
	After heating-cooling test	Gel base	Day 1	10	67	71.5	75.1	28.8	4.05832	2.3
				100	70	72.5	75	27.5	2.5	1.4
			Day 2	10	48	50.5	52.1	49.8	2.0664	1.2
				100	42	48.5	55.6	51.3	6.80221	3.9
			Day 3	10	26	30.5	35	69.5	4.5	2.5
				100	18	20.5	22.4	79.7	2.20681	1.3
		0.10% KG6 mouth gel	Day 1	10	28.484	28.4366	28.7438	71.4	0.2	0.1
				100	38.536	35.2424	36.9	63.1	1.6	1
			Day 2	10	12.885	12.5336	14.0444	86.8	0.8	0.5
				100	22.4583	23.191	24.0288	76.8	0.8	0.5
			Day 3	10	0.75291	1.24716	1.31124	98.9	0.3	0.2
				100	3.31647	1.47604	2.74423	97.5	0.9	0.5
		0.25% KG6 mouth gel	Day 1	10	39.1098	35.4023	32.1321	64.5	3.5	2
				100	33.8349	32.4589	30.9876	67.6	1.4	0.8
			Day 2	10	18.3059	17.3302	13.5733	83.6	2.5	1.4
				100	14.9103	10.7966	12.5855	87.2	2.1	1.2
			Day 3	10	5.30988	3.47416	4.76734	95.5	0.9	0.5
				100	1.07526	4.19275	1.19047	97.8	1.8	1
		0.50% KG6 mouth gel	Day 1	10	32.9229	36.5208	39.062	63.8	3.1	1.8
				100	28.2871	25.5711	30.9929	71.7	2.7	1.6
			Day 2	10	12.6941	13.7895	10.8008	87.6	1.5	0.9
				100	15.6787	12.2845	12.568	86.5	1.9	1.1
			Day 3	10	4.69628	4.16149	3.03658	96	0.8	0.5
				100	3.51708	3.49645	3.84076	96.4	0.2	0.1
	Positive control	TA oral paste	Day 1	10	84.6	75.9	80.8	19.6	4.4	2.5
			Day 2	10	60.2	66.5	52.4	40.3	7	4.1
			Day 3	10	44.6	67.4	53.5	44.8	11.5	6.6
		Khaolaor mouth gel	Day 1	10	65.3	53	76	35.2	11.5	6.7
			Day 2	10	46.3	32.9	58.6	54.1	12.8	7.4
			Day 3	10	24.8	24.9	29.9	73.5		1.7

## Sheet: Table 10
	Table 10. Effect of KG6 and gallic acid on H2O2-induced HGF-1 cell viability.
	HGF-1 cells viability (%)
	Sample		Conc. (µM)	Repeat 1 (%)	Repeat 2 (%)	Repeat 3 (%)	Average (%)	SD	SEM
	Control	Control	-	100	100	100	100	0	0
		H2O2	-	28.5971	30.7554	31.6547	30.3	1.6	0.9
	Sample	KG6 compound	1	25.1799	34.7122	39.7482	33.2	7.39892	4.3
			3	32.7338	34.7122	32.554	33.3	1.19754	0.7
			10	37.4101	33.4532	28.777	33.2	4.32154	2.5
			30	32.1942	32.7338	32.9137	32.6	0.3744	0.2
			100	32.7338	33.8129	33.8129	33.5	0.62304	0.4
	Positive control	Gallic acid	1	35.4317	26.0791	38.8489	33.5	6.61078	3.8
			3	39.0288	30.3957	38.8489	36.1	4.93322	2.8
			10	41.3669	33.6331	41.9065	39	4.62875	2.7
			30	40.6475	32.9137	40.2878	37.9	4.36499	2.5
			100	38.3094	32.554	41.9065	37.6	4.71758	2.7

## Sheet: Table 11
	Table 11. Effect of gel base and mouth gel containing KG6 on H2O2-induced HGF-1 cell viability.
		HGF-1 cells viability (%)
		Sample	Conc (µg/ml)	Repeat 1 (%)	Repeat 2 (%)	Repeat 3 (%)	Average (%)	SD	SEM
	Control	Control	-	100	100	100	100	0	0
		H2O2	-	33.6331	34.7122	39.0288	35.7914	2.85513	1.64841
	Before heating-cooling test	Gel base	1	32.554	33.8129	39.3885	35.2518	3.63736	2.10003
			3	33.6331	37.2302	37.2302	36.0312	2.0768	1.19904
			10	33.0935	36.3309	37.5899	35.6715	2.31961	1.33923
			30	34	34.6	35.3	34.6333	0.650641	0.375648
			100	35.0719	36.3309	36.3309	35.9113	0.72688	0.419664
		0.1% KG6 mouth gel	1	36.3	37.6	37	36.9667	0.650641	0.375648
			3	35.6	29.4	46.1	37.0333	8.44176	4.87385
			10	36.5108	34.2727	35.1	35.2945	1.13167	0.653369
			30	31.1151	31.6547	38.6691	33.8129	4.21416	2.43305
			100	41.3	41.5	37.6	40.1333	2.19621	1.26798
		0.25% KG6 mouth gel	1	47.8417	34.1727	36.5108	39.5084	7.31095	4.22098
			3	37.0504	40.1079	42.6259	39.9281	2.79212	1.61203
			10	44.4245	40.6475	37.5899	40.8873	3.42357	1.9766
			30	38.6691	38.1295	38.4892	38.4293	0.274735	0.158618
			100	42.0863	41.5468	42.8058	42.1463	0.631634	0.364674
		0.5% KG6 mouth gel	1	44.0647	37.9496	40.8273	40.9472	3.05932	1.7663
			3	45.8633	36.5108	34.8921	39.0887	5.92252	3.41937
			10	36.3309	52.518	44.2446	44.3645	8.09419	4.67318
			30	52.5	56.6	50.5	53.2	3.10966	1.79536
			100	56.295	55.3957	49.6403	53.777	3.61059	2.08457
	After heating-cooling test	Gel base	1	35.0719	39.0288	33.9928	36.0312	2.65148	1.53083
			3	36.6906	36.6906	33.6331	35.6715	1.76528	1.01918
			10	34.3	38.8	36.9	36.6667	2.25906	1.30427
			30	35.4317	36.8705	35.0719	35.7914	0.951709	0.54947
			100	34.5324	36.8705	33.8129	35.0719	1.5986	0.92295
		0.1% KG6 mouth gel	1	33.2	38.8	36	36	2.8	1.61658
			3	37.7	37.8	36.9	37.4667	0.493288	0.2848
			10	35.6115	35.6115	32.7338	34.6523	1.66144	0.959233
			30	34.5	33.8	33.2	33.8333	0.650641	0.375648
			100	39.3	38.8	38.3	38.8	0.5	0.288675
		0.25% KG6 mouth gel	1	37	38	40.6	38.5333	1.85831	1.0729
			3	38.7	41.5	35.5	38.5667	3.00222	1.73333
			10	40.4676	44.4245	36.3309	40.4077	4.0471	2.33659
			30	35.2518	44.2446	40.2878	39.9281	4.50718	2.60222
			100	41.7266	44.4	47.3022	44.4763	2.78855	1.60997
		0.5% KG6 mouth gel	1	40.1079	41.3669	39.9281	40.4676	0.783975	0.452628
			3	35.2518	41.7266	41.5468	39.5084	3.68742	2.12893
			10	48.3	41.7	44.6	44.8667	3.30807	1.90992
			30	53.5971	52.3381	44.7842	50.2398	4.76647	2.75192
			100	63.9	50.5	36.7	50.3667	13.6005	7.85225
	Positive control	TA oral paste	1	20	29.3	38.6	29.3	9.3	5.36936
			3	36.1	29	43.2	36.1	7.1	4.09919
			10	33	27.7	38.5	33.0667	5.40031	3.11787
			30	46	42.1	48.7	45.6	3.31813	1.91572
			100	27.6	37.7	53.3	39.5333	12.9477	7.47537
		Khaolaor mouth gel	1	47.1223	43.5252	39.2086	43.2854	3.96228	2.28762
			3	44.6043	42.9856	48.0216	45.2038	2.57096	1.48434
			10	44.7842	39.0288	45.3237	43.0456	3.48909	2.01442
			30	46.4029	42.2662	45.3237	44.6643	2.14575	1.23885
			100	46.4029	38.3094	41.5468	42.0863	4.07365	2.35192
